# Supplementary material for: Exercise facilities and the prevalence of obesity and type 2 diabetes in the city of Madrid
Source: PubMed Central journal article supplement (PMC8660723; doi:10.1007/s00125-021-05582-5), 2021-10-28
Supplement: 125_2021_5582_MOESM1_ESM.pdf [file 125_2021_5582_MOESM1_ESM.pdf]

# **Exercise facilities and prevalence of obesity and type 2 diabetes mellitus: A population study of 1,270,512 adults from an equity perspective in the city of Madrid.**

Luis Cereijo, Pedro Gullón, Isabel del Cura, David Valadés,  
Usama Bilal, Hannah Badland, Manuel Franco.

## **SUPPLEMENTARY MATERIALS**

- ESM Table 1.** Characteristics by January 1<sup>st</sup>, 2017 of administrative units in the City of Madrid and whole Spain.
- ESM Table 2.** Description of the classification of the exercise facilities based on its characteristics.
- ESM Table 3.** Area Level Socioeconomic status indicators.
- ESM Table 4.** Sensitivity analysis by deciles of exercise facilities availability.

**ESM Table 1.** Characteristics by January 1<sup>st</sup>, 2017 of administrative units in the City of Madrid and whole Spain

|                       | <b>Unit</b>                   | <b>Description</b>              | <b>N</b> | <b>Area*</b>                   | <b>Population*</b>          |
|-----------------------|-------------------------------|---------------------------------|----------|--------------------------------|-----------------------------|
| <b>SPAIN</b>          | <b>Autonomous Communities</b> | Main Regional division of Spain | 17       | 11073.55<br>(4995.87-93827.15) | 2031.48<br>(315.38-8379,82) |
|                       | <b>Provinces</b>              | Main Regional Subdivision       | 52       | 9722.31<br>(1906.09-21792.47)  | 611764.5<br>(84.96-6507.18] |
|                       | <b>Municipalities</b>         | Main Local division of Spain    | 8124     | 34.9<br>(0.03-1753.85)         | 0.53<br>(0-3182.98)         |
| <b>CITY OF MADRID</b> | <b>Census Districts</b>       | Main Local subdivision          | 21       | 14.05<br>(4.68-237.84)         | 143.42<br>(46.88-244)       |
|                       | <b>Neighborhoods</b>          | Sub-divisions of districts      | 131      | 1.36<br>(0.25-187.6)           | 22.40<br>(1.11-80.3)        |
|                       | <b>Census Sections</b>        | Basic census area               | 2443     | 0.04<br>[0.1-94.7]             | 1.2<br>(0.11-2.44)          |

Key: \*Area is in km<sup>2</sup> and shown as the Median (Min-Max); Population is in 1000s of residents, excluding the two Autonomous Cities (Ceuta and Melilla), and shown as the Median (Min-Max).

**ESM Table 2.** Description of the classification of the exercise facilities based on its characteristics.

| <b>Exercise facility type</b> | <b>Definition</b>                                                                                                        | <b>N (%)</b> |
|-------------------------------|--------------------------------------------------------------------------------------------------------------------------|--------------|
| <b>All the facilities</b>     |                                                                                                                          | 595          |
| <b>Publicly owned</b>         | Monthly payment option. Public ownership                                                                                 | 59 (10%)     |
| <b>Privately owned</b>        | Monthly payment $\geq$ 30€/month. Private ownership                                                                      | 222 (37%)    |
| <b>Low cost</b>               | Monthly payment < 30€/month. Private ownership                                                                           | 63 (11%)     |
| <b>Sessional</b>              | Facilities with Pay-per-session (e.g. Pilates Studios, Dance Schools, electrostimulation centres...). Private ownership. | 251 (42%)    |

**ESM Table 3.** Area Level Socioeconomic status indicators.

| <b>Construct</b> | <b>Domain</b>     | <b>Indicator</b>        | <b>Operationalization</b>                                                           | <b>Source</b>      | <b>Level</b>   |
|------------------|-------------------|-------------------------|-------------------------------------------------------------------------------------|--------------------|----------------|
| SES              | Education         | Low Education           | Residents with mandatory studies or below / all residents aged 25 years or above    | Padron             | Census Section |
|                  |                   | High Education          | Residents with university education or above / all residents aged 25 years or above | Padron             | Census Section |
|                  | Occupation        | Part time Jobs          | Workers in part-time jobs / all workers                                             | Social Security    | Neighbourhood  |
|                  |                   | Temporary Jobs          | Workers in temporal jobs / all workers                                              |                    |                |
|                  |                   | Manual Occupation Class | Workers in manual or unskilled occupations / all workers                            |                    |                |
|                  | Wealth            | Housing Prices          | Average sale price of housing per m <sup>2</sup>                                    | Idealista Report   | Census Section |
|                  | Living Conditions | Unemployment Rate       | Residents registered as unemployed / all residents aged 16–64 years                 | Employment Service | Neighbourhood  |

**Key:** SES = Socio-Economic Status

**ESM Table 4.** Sensitivity analysis: Association between exercise facility availability (by deciles) and prevalence of obesity and type 2 diabetes in Madrid, adjusted by gender, age and population density.

| <b>Exercise facilities availability</b>    | <b>Decil 1<br/>High</b> | <b>Decil 2</b>        | <b>Decil 3</b>        | <b>Decil 4</b>        | <b>Decil 5</b>        | <b>Decil 6</b>        | <b>Decil 7</b>        | <b>Decil 8</b>        | <b>Decil 9</b>        | <b>Decil 10<br/>Low</b> |
|--------------------------------------------|-------------------------|-----------------------|-----------------------|-----------------------|-----------------------|-----------------------|-----------------------|-----------------------|-----------------------|-------------------------|
| <b>Prevalence Ratio of Obesity</b>         | 1<br>(Ref.)             | 1.08<br>(1.05 - 1.11) | 1.09<br>(1.06 - 1.12) | 1.19<br>(1.16 - 1.22) | 1.22<br>(1.19 - 1.26) | 1.26<br>(1.23 - 1.30) | 1.30<br>(1.26 - 1.33) | 1.30<br>(1.26 - 1.33) | 1.36<br>(1.33 - 1.40) | 1.26<br>(1.22 - 1.29)   |
| <b>Prevalence Ratio of Type 2 Diabetes</b> | 1<br>(Ref.)             | 1.13<br>(1.09 - 1.16) | 1.22<br>(1.18 - 1.26) | 1.43<br>(1.39 - 1.47) | 1.41<br>(1.37 - 1.45) | 1.54<br>(1.49 - 1.58) | 1.55<br>(1.51 - 1.60) | 1.57<br>(1.52 - 1.61) | 1.69<br>(1.64 - 1.74) | 1.49<br>(1.44 - 1.54)   |

Results are Prevalence Ratio (Confidence Interval at 95%). All coefficients are statistically significant ( $p < 0.000$ ). Ref= Decile of reference.
